# Supplementary material for: Expanded in vivo substrate profile of the yeast N-terminal acetyltransferase NatC
Source: PubMed Central journal article supplement (PMC9867985; doi:10.1016/j.jbc.2022.102824), 2022-12-22
Supplement: mmc1.pdf [file mmc1.pdf]

## Supporting Information

**Table S1.** (Separate file)

**List of 1,596 yeast N-termini identified in the (subcellular) proteomes of WT, naa30 $\Delta$ , naa30 $\Delta$ [hNAA30] yeast.** Identity of the amino acid residue (P1) preceding the identified N-terminus (if any), peptide sequence identified, identity of the first two amino acid residue (P1' and P2') of the identified N-terminus, start and end positions of identified N-termini, NAT type specificity, UniProt database primary accession number, UniProt entry name, gene name, corresponding protein description, N-terminal modification status/states confirmed by MS/MS (PSMs per modification/in total/per project), determined Nt-acetylation in % (per setup, strain, (subcellular) fraction) and overview of corresponding project numbers, strain identities and fractions are given. Further, the highest MASCOT score per N-terminal peptide is reported and whenever a peptide matched to multiple protein or multiple protein members of a protein family (redundancy), isoforms are given for all uniquely identified yeast N-termini. N-termini are grouped according to their UniProt database start position and compliance with the rules of N-terminal acetylation and iMet processing and ranked alphabetically according to their NAT type and sequence. Abbreviations used: TL: total lysates, Ace: Nt-acetylation, ( $^{13}\text{C}_2\text{D}_3$ )Ace: heavy/*in vitro* ( $^{13}\text{C}_2$  and trideutero-)Nt-acetylation.

**Table S2. *S. cerevisiae* NatC substrates identified and their degree of Nt-acetylation by hNAA30.** Unique protein N-termini detected as Nt-acetylated in WT yeast and not in *naa30Δ* yeast with their Nt-acetylation status detected in the hNAA30 COFRADIC sample and estimated degree of Nt-acetylation rescue.

| Protein (UNIPROT) | Nt-sequence                | P1' | P2' | Start | NtAc in WT yeast | NtAc in <i>naa30Δ</i> [hNAA30] | Degree of rescue by hNAA30 |
|-------------------|----------------------------|-----|-----|-------|------------------|--------------------------------|----------------------------|
| HSP77             | MLAAKNILNR                 | M   | L   | 1     | 100 %            | 91-93 %                        | 91-93 %                    |
| ODPA              | MLAASFQR                   |     |     | 1     | 97-100 %         | 87-92 %                        | 91 %                       |
| PRP19             | MLCAISGKVPFR               |     |     | 1     | 64 %             | not detected                   | N.D.                       |
| LST4              | MLGNLLR                    |     |     | 1     | 100 %            | 88-100 %                       | 88-100 %                   |
| ADRX              | MLKIVTR                    |     |     | 1     | 100 %            | 17 %                           | 17 %                       |
| BEM1              | MLKNFKLSKR                 |     |     | 1     | 100 %            | 95-100 %                       | 95-100 %                   |
| NFS1              | MLKSTATR                   |     |     | 1     | 100 %            | 95-100 %                       | 95-100 %                   |
| CRF1              | MLLSAPVNSTVR               |     |     | 1     | 26 %             | not detected                   | N.D.                       |
| YG10              | MLLTPAKTTR                 |     |     | 1     | 54 %             | 0 %                            | 0 %                        |
| HUL5              | MLNFTGQTR                  |     |     | 1     | 100 %            | 90-100 %                       | 90-100 %                   |
| ETR1              | MLPTFKR                    |     |     | 1     | 100 %            | 96 %                           | 96 %                       |
| YEY8              | MLQQGSSSR                  |     |     | 1     | 100 %            | 61-67 %                        | 61-67 %                    |
| GSHR              | MLSATKQTFR                 |     |     | 1     | 100 %            | 93-96 %                        | 93-96 %                    |
| NOT1              | MLSATYR                    |     |     | 1     | 100 %            | 82-84 %                        | 82-84 %                    |
| SKS1              | MLSDCLLNFR                 |     |     | 1     | 0-15 %           | 0 %                            | 0 %                        |
| PDC2              | MLSIQQR                    |     |     | 1     | 10-15 %          | 0 %                            | 0 %                        |
| BAP2              | MLSSDFGSSGKETSPPDISIR      |     |     | 1     | 10 %             | 11 %                           | 110 %                      |
| MSN4              | MLVFGPNSSFVR               |     |     | 1     | 100 %            | 91-100 %                       | 91-100 %                   |
| AIM18             | MLKSLQR                    |     |     | 9     | 80 %             | 9-11 %                         | 12 %                       |
| LKHA4             | MLPLSIEQR                  |     |     | 40    | 7-29 %           | 0-10 %                         | 22 %                       |
| PCD1              | MLSSKQIENLIR               |     |     | 8     | 58 %             | 5 %                            | 9 %                        |
| AFG1              | MIALKPNNAVR                | M   | I   | 1     | 100 %            | 62 %                           | 62 %                       |
| YJ133             | MIAQSTR                    |     |     | 1     | 8-20 %           | 3-25 %                         | 83 %                       |
| ISF1              | MIASEIFER                  |     |     | 1     | 9-13%            | not detected                   | N.D.                       |
| HOT13             | MIETAIYGKTVDDQSR           |     |     | 1     | 1-8 %            | 0 %                            | 0 %                        |
| LRG1              | MIQNSAGYR                  |     |     | 1     | 100 %            | 73-86 %                        | 73-86 %                    |
| SLY41             | MIQTQSTAIKR                |     |     | 1     | 94 %             | 46-58 %                        | 82 %                       |
| ACM1              | MISPSKRR                   |     |     | 1     | 73-94 %          | 15-27 %                        | 26 %                       |
| SRV1              | MIVPTYGDVLDASNR            |     |     | 1     | 3-8 %            | 0 %                            | 0 %                        |
| TFC6              | MIKLR                      |     |     | 246   | 100 %            | 75-92 %                        | 75-92 %                    |
| YD239             | MFDGFSNNGKGR               | M   | F   | 1     | 100 %            | 100 %                          | 100 %                      |
| RFC2              | MFEFGFPNKKR                |     |     | 1     | 99-100%          | 34-46 %                        | 34-46 %                    |
| RRN11             | MFEVPITLTNR                |     |     | 1     | 47-48%           | 0-3 %                          | 2 %                        |
| DPOE              | MFGKKNNGGSSTAR             |     |     | 2     | 100 %            | 61-68 %                        | 61-68 %                    |
| NU116             | MFGVSR                     |     |     | 1     | 100 %            | 97-100 %                       | 97-100 %                   |
| TMA20             | MFKKFTR                    |     |     | 1     | 97 %             | 6-8 %                          | 8 %                        |
| SRO77             | MFKKSRR                    |     |     | 1     | 100 %            | 92-97 %                        | 92-97 %                    |
| RSF2              | MFVNGNQSNFAKPAGQGILPIPKKSR |     |     | 116   | 76 %             | not detected                   | N.D.                       |
| SSN3              | MYNGKDR                    | M   | Y   | 1     | 81 %             | 35 %                           | 43 %                       |
| MCA1              | MYPGSGR                    |     |     | 1     | 99 %             | 88-93 %                        | 91 %                       |
| NU157             | MYSTPLKRR                  |     |     | 1     | 97-100 %         | 50-87 %                        | 67 %                       |
| EKI1              | MYTNYSLTSSDAMPR            |     |     | 1     | 44-66 %          | 61-74 %                        | 122 %                      |
| RIR1              | MYVYKR                     |     |     | 1     | 67-85 %          | 12-34 %                        | 26 %                       |
| POF1              | MKKTFEQFR                  | M   | K   | 1     | 13-29 %          | 0 %                            | 0 %                        |
| ITR2              | MKNSTAASSR                 |     |     | 1     | 11-17 %          | 0-5 %                          | 15 %                       |
| TOM70             | MKSFITR                    |     |     | 1     | 9-21 %           | 0 %                            | 0 %                        |
| MG101             | MKSIFKVR                   |     |     | 1     | 100 %            | 11-19 %                        | 11-19 %                    |
| ATG8              | MKSTFKSEYPFEKR             |     |     | 1     | 16-18 %          | 0-3 %                          | 9 %                        |
| SCM3              | MKTNKKISKR                 |     |     | 1     | 90-100 %         | 7-11 %                         | 8 %                        |
| OTU2              | MKKQATKSKR                 |     |     | 34    | 96 %             | 21 %                           | 22 %                       |
| DAD1              | MMASTSNDEEKLISTTDKYFIEQR   | M   | M   | 1     | 20 %             | not detected                   | N.D.                       |
| LOT5              | MMKKPKCQIAR                |     |     | 1     | 44-53 %          | 8 %                            | 17 %                       |
| NGR1              | MMSNVANASQR                |     |     | 1     | 94-96 %          | 68-79 %                        | 78 %                       |
| HOT1              | MMPTTLKDGYSR               |     |     | 37    | 100 %            | not detected                   | N.D.                       |
| ENO1              | MAVSKVYAR                  | M   | A   | 1     | 0-5%             | 0-4 %                          | 88 %                       |
| RL44A             | MVNVPKTR                   | M   | V   | 1     | 5-8 %            | 0 %                            | 0 %                        |
| CYPH              | MSQVYFDVEADGQPIGR          | M   | S   | 1     | 13 %             | 6 %                            | 47 %                       |

**Table S3. Yeast strains used in this study.**

| Strain    | Short name                                 | Genotype                                                                                                                                                      | Use                                  |
|-----------|--------------------------------------------|---------------------------------------------------------------------------------------------------------------------------------------------------------------|--------------------------------------|
| TA36      | -                                          | BY4742; <i>Mata</i> ; <i>his3Δ1</i> ; <i>leu2Δ0</i> ; <i>lys2Δ0</i> ; <i>ura3Δ0</i>                                                                           | Strain generation                    |
| TA44      | -                                          | BY4742; <i>Mata</i> ; <i>his3Δ1</i> ; <i>leu2Δ0</i> ; <i>lys2Δ0</i> ; <i>ura3Δ0</i> ; <i>naa30Δ::kanMX4</i>                                                   | Strain generation                    |
| TA47/135  | Ctrl/WT/<br>yNaa30                         | BY4742; <i>Mata</i> ; <i>his3Δ1</i> ; <i>leu2Δ0</i> ; <i>lys2Δ0</i> ; <i>ura3Δ0</i> ; [pBEVY-U]                                                               | Growth assay;<br>COFRADIC<br>(TA47)  |
| TA61/62   | <i>naa30Δ</i>                              | BY4742; <i>Mata</i> ; <i>his3Δ1</i> ; <i>leu2Δ0</i> ; <i>lys2Δ0</i> ; <i>ura3Δ0</i> ; <i>naa30Δ::kanMX4</i> ; [pBEVY-U]                                       | Growth assay;<br>COFRADIC<br>(TA61)  |
| TA124/125 | <i>naa30Δ</i> -<br>[hNAA30]                | BY4742; <i>Mata</i> ; <i>his3Δ1</i> ; <i>leu2Δ0</i> ; <i>lys2Δ0</i> ; <i>ura3Δ0</i> ; <i>naa30Δ::kanMX4</i> ; [pBEVY-U-HA-hNAA30]                             | Growth assay;<br>COFRADIC<br>(TA124) |
| TA256     | -                                          | BY4741; <i>Mata</i> ; <i>his3Δ1</i> ; <i>leu2Δ0</i> ; <i>met15Δ0</i> ; <i>ura3Δ0</i> ; <i>ARL3::GFP-HIS3MX6</i>                                               | Strain generation                    |
| TA266     | -                                          | BY4741; <i>Mata</i> ; <i>his3Δ1</i> ; <i>leu2Δ0</i> ; <i>met15Δ0</i> ; <i>ura3Δ0</i> ; <i>ARL3::GFP-HIS3MX6</i> ; <i>naa30Δ::kanMX4</i>                       | Strain generation                    |
| TA371/372 | Arl3-GFP,<br>WT/Ctrl                       | BY4741; <i>Mata</i> ; <i>his3Δ1</i> ; <i>leu2Δ0</i> ; <i>met15Δ0</i> ; <i>ura3Δ0</i> ; <i>ARL3::GFP-HIS3MX6</i> ; [pBEVY-U]                                   | Imaging                              |
| TA373/374 | Arl3-GFP-<br><i>naa30Δ</i>                 | BY4741; <i>Mata</i> ; <i>his3Δ1</i> ; <i>leu2Δ0</i> ; <i>met15Δ0</i> ; <i>ura3Δ0</i> ; <i>ARL3::GFP-HIS3MX6</i> ; <i>naa30Δ::kanMX4</i> ; [pBEVY-U]           | Imaging                              |
| TA381/382 | Arl3-GFP-<br><i>naa30Δ</i> , -<br>[yNAA30] | BY4741; <i>Mata</i> ; <i>his3Δ1</i> ; <i>leu2Δ0</i> ; <i>met15Δ0</i> ; <i>ura3Δ0</i> ; <i>ARL3::GFP-HIS3MX6</i> ; <i>naa30Δ::kanMX4</i> ; [pBEVY-U-yNAA30]    | Imaging                              |
| TA375/376 | Arl3-GFP-<br><i>naa30Δ</i> -<br>[hNAA30]   | BY4741; <i>Mata</i> ; <i>his3Δ1</i> ; <i>leu2Δ0</i> ; <i>met15Δ0</i> ; <i>ura3Δ0</i> ; <i>ARL3::GFP-HIS3MX6</i> ; <i>naa30Δ::kanMX4</i> ; [pBEVY-U-HA-hNAA30] | Imaging                              |

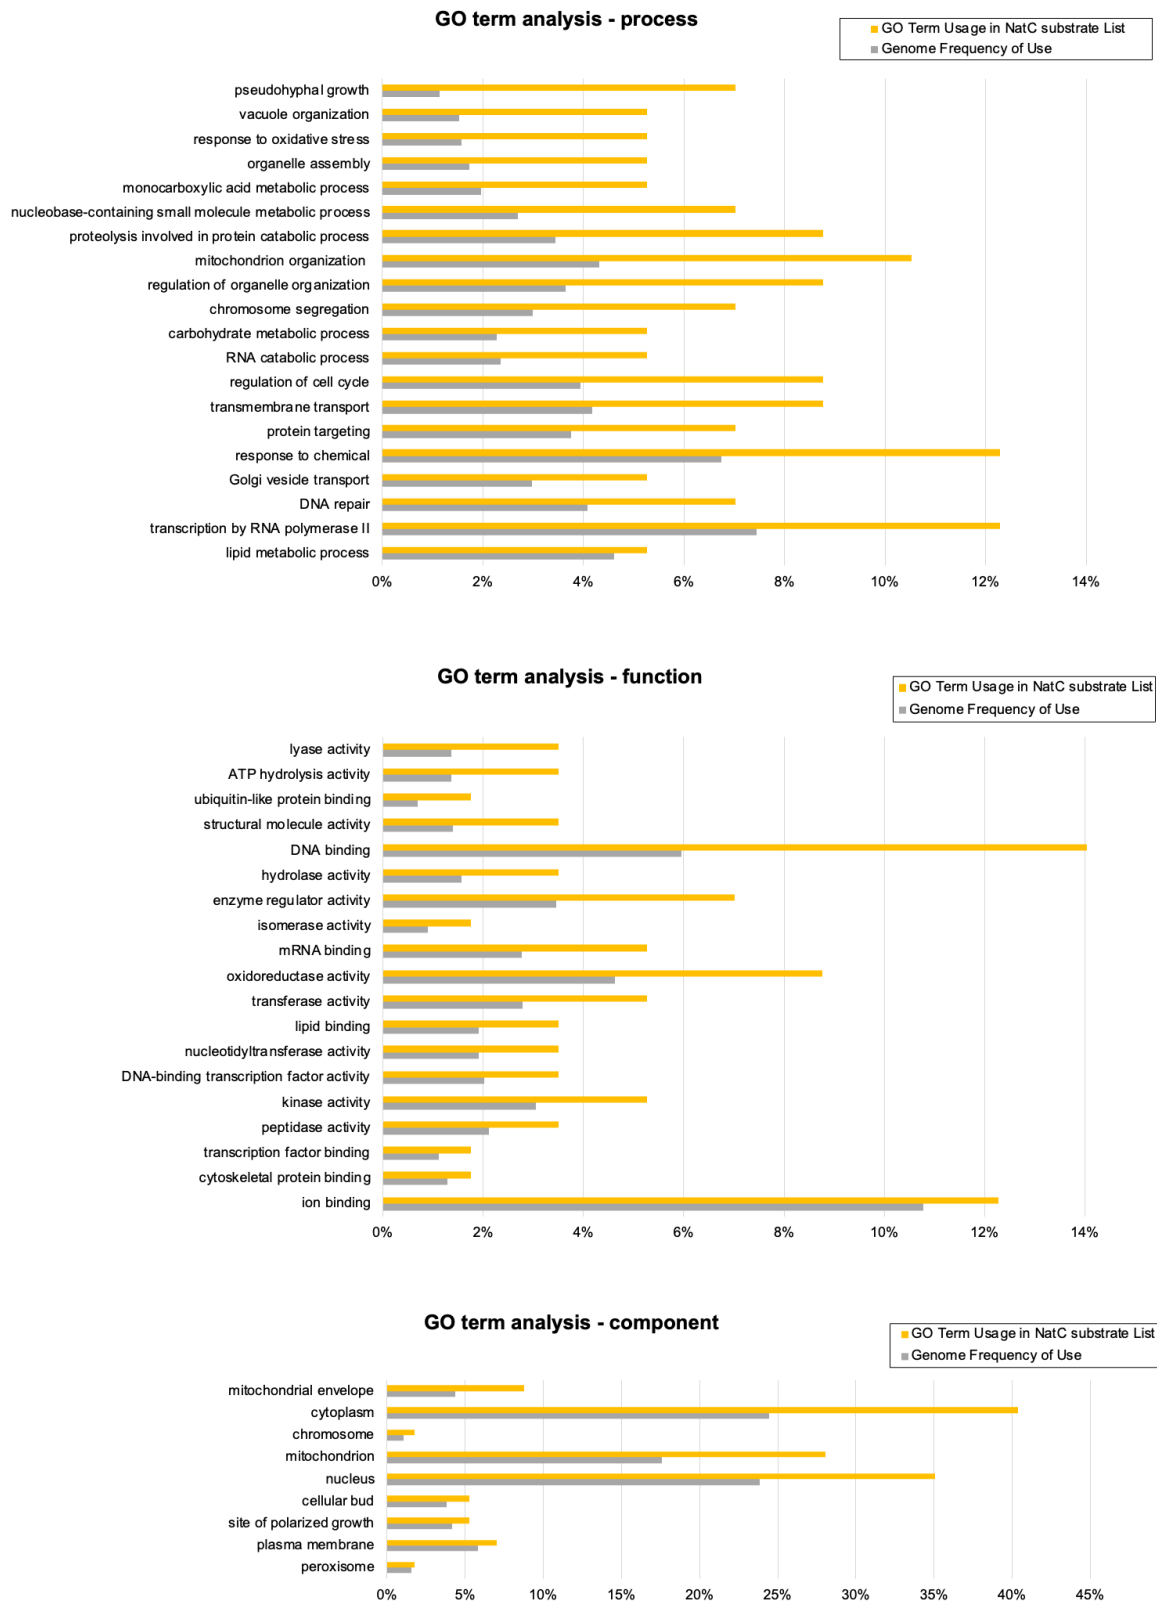

**Figure S1. Yeast GO term analysis.** The 57 proteins identified here as yeast NatC substrates were investigated for GO term frequency against GO term frequency in the *S. cerevisiae* genome (Slim GO at <https://www.yeastgenome.org>).
